# Supplementary material for: The small eye phenotype in the EPIC-Norfolk eye study: prevalence and visual impairment in microphthalmos and nanophthalmos
Source: PubMed Central journal article supplement (PMC3731707; doi:10.1136/bmjopen-2013-003280), 2013-07-23
Supplement: bmjopen-2013-003280.draft_revisions.pdf [file bmjopen-2013-003280.draft_revisions.pdf]

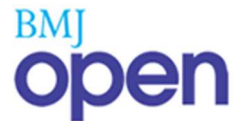

**The Small Eye Phenotype in the EPIC-Norfolk Eye Study:  
Prevalence and Visual Impairment in Microphthalmos and  
Nanophthalmos.**

|                                 |                                                                                                                                                                                                                                                                                                                                                                                                                                                                                                                                                                                                                                                                                                                                                                                                                                                                                                                                                                                                                                                                                                                                                                                                                            |
|---------------------------------|----------------------------------------------------------------------------------------------------------------------------------------------------------------------------------------------------------------------------------------------------------------------------------------------------------------------------------------------------------------------------------------------------------------------------------------------------------------------------------------------------------------------------------------------------------------------------------------------------------------------------------------------------------------------------------------------------------------------------------------------------------------------------------------------------------------------------------------------------------------------------------------------------------------------------------------------------------------------------------------------------------------------------------------------------------------------------------------------------------------------------------------------------------------------------------------------------------------------------|
| Journal:                        | <i>BMJ Open</i>                                                                                                                                                                                                                                                                                                                                                                                                                                                                                                                                                                                                                                                                                                                                                                                                                                                                                                                                                                                                                                                                                                                                                                                                            |
| Manuscript ID:                  | bmjopen-2013-003280                                                                                                                                                                                                                                                                                                                                                                                                                                                                                                                                                                                                                                                                                                                                                                                                                                                                                                                                                                                                                                                                                                                                                                                                        |
| Article Type:                   | Research                                                                                                                                                                                                                                                                                                                                                                                                                                                                                                                                                                                                                                                                                                                                                                                                                                                                                                                                                                                                                                                                                                                                                                                                                   |
| Date Submitted by the Author:   | 22-May-2013                                                                                                                                                                                                                                                                                                                                                                                                                                                                                                                                                                                                                                                                                                                                                                                                                                                                                                                                                                                                                                                                                                                                                                                                                |
| Complete List of Authors:       | Day, Alex; UCL Institute of Ophthalmology, Khawaja, Anthony; University of Cambridge School of Clinical Medicine, Cambridge, United Kingdom, Department of Public Health and Primary Care, Institute of Public Health<br>Peto, Tunde; The NIHR Biomedical Research Centre at Moorfields Eye Hospital NHS Foundation Trust and UCL Institute of Ophthalmology., Hayat, Shabina; University of Cambridge School of Clinical Medicine, Cambridge, United Kingdom, Department of Public Health and Primary Care, Institute of Public Health<br>Luben, Robert; University of Cambridge School of Clinical Medicine, Cambridge, United Kingdom, Department of Public Health and Primary Care, Institute of Public Health<br>Broadway, David; Norfolk & Norwich University Hospital, Dept. Ophthalmology<br>Khaw, KayTee; University of Cambridge School of Clinical Medicine, Cambridge, United Kingdom, Department of Public Health and Primary Care, Institute of Public Health; University of Cambridge, Clinical Medicine<br>Foster, Paul; Institute of Ophthalmology, Division of of Epidemiology; The NIHR Biomedical Research Centre at Moorfields Eye Hospital NHS Foundation Trust and UCL Institute of Ophthalmology., |
| <b>Primary Subject Heading</b>: | Ophthalmology                                                                                                                                                                                                                                                                                                                                                                                                                                                                                                                                                                                                                                                                                                                                                                                                                                                                                                                                                                                                                                                                                                                                                                                                              |
| Secondary Subject Heading:      | Epidemiology                                                                                                                                                                                                                                                                                                                                                                                                                                                                                                                                                                                                                                                                                                                                                                                                                                                                                                                                                                                                                                                                                                                                                                                                               |
| Keywords:                       | OPHTHALMOLOGY, EPIDEMIOLOGY, Glaucoma < OPHTHALMOLOGY                                                                                                                                                                                                                                                                                                                                                                                                                                                                                                                                                                                                                                                                                                                                                                                                                                                                                                                                                                                                                                                                                                                                                                      |
|                                 |                                                                                                                                                                                                                                                                                                                                                                                                                                                                                                                                                                                                                                                                                                                                                                                                                                                                                                                                                                                                                                                                                                                                                                                                                            |

SCHOLARONE™  
Manuscripts

1  
2  
3  
4  
5  
6  
7  
8  
9

# The Small Eye Phenotype in the EPIC-Norfolk Eye Study: Prevalence and Visual Impairment in Microphthalmos and Nanophthalmos.

10  
11

## AUTHORS

12 Alexander C Day<sup>1</sup>, Anthony P Khawaja<sup>2</sup>, Tunde Peto<sup>1</sup>, Shabina Hayat<sup>2</sup>, Robert  
13 Luben<sup>2</sup>, David C Broadway<sup>3</sup>, Kay-Tee Khaw<sup>2</sup>, Paul J Foster<sup>1</sup>  
14  
15  
16

17  
18

## INSTITUTIONS

19  
20  
21  
22  
23  
24  
25  
26  
27  
28

<sup>1</sup>The NIHR Biomedical Research Centre at Moorfields Eye Hospital NHS Foundation Trust and UCL Institute of Ophthalmology, London, United Kingdom

29  
30  
31  
32  
33

<sup>2</sup>Department of Public Health and Primary Care, Institute of Public Health, University of Cambridge School of Clinical Medicine, Cambridge, United Kingdom

34  
35  
36  
37  
38  
39  
40  
41  
42  
43  
44  
45  
46  
47  
48  
49  
50  
51  
52  
53  
54  
55  
56  
57  
58  
59  
60

<sup>3</sup>Department of Ophthalmology, Norfolk and Norwich University Hospital NHS Foundation Trust and University of East Anglia, Norwich, United Kingdom

## CORRESPONDENCE

Professor Paul Foster  
UCL Institute of Ophthalmology  
11-43 Bath Street  
London  
EC1V 9EL  
Tel. 00 44 (0)20 7608 6901  
Email: p.foster@ucl.ac.uk

## KEYWORDS:

Microphthalmos [MeSH]

Nanophthalmos [MeSH]

Epidemiology [MeSH]

Axial length, eye [MeSH]

Visual acuity [MeSH]

For peer review only

**Abstract:****Objective:**

To describe the prevalence and phenotypic characteristics of small eyes in the EPIC-Norfolk Eye Study.

**Design:**

Community cross-sectional study.

**Setting:**

East England population (Norwich, Norfolk and surrounding area).

**Participants:**

8033 participants aged 48-91 years old from the EPIC-Norfolk Eye Study, Norfolk, United Kingdom with axial length measurements. Participants underwent a standardized ocular examination including visual acuity (LogMAR), ocular biometry, non-contact tonometry, auto-refraction and fundal photography. A small eye phenotype was defined as a participant with one or both eyes with axial length of <21.00mm.

**Outcome measures:**

Prevalence of small eyes, proportion with visual impairment, demographic and biometric factors.

**Results:**

Ninety-six participants (1.20%, 95% CI: 0.98 to 1.46) had an eye with axial length less than 21.00mm, of which 74 (77%) were female. Prevalence values for shorter axial lengths were <20.00mm: 0.27% (0.18 to 0.41); <19.00mm: 0.17% (0.11 to 0.29); <18.00mm: 0.14% (0.08 to 0.25). Two participants (2.1%) had low vision (presenting visual acuity >0.48 LogMAR) and 1 participant was blind (>1.3 logMAR). The prevalence of unilateral visual impairment was higher in participants with a small eye. Multiple logistic regression modeling showed presence of a small eye to be significantly associated with shorter height, lower body mass index, higher systolic blood pressure and lower intraocular pressure.

**Conclusions:**

The prevalence of people with small eyes is higher than previously thought. Whilst small eyes were more common in women, this appears to be related to shorter height and lower body mass index. Participants with small eyes were more likely to be blind or to have unilateral visual impairment.

**Article summary:****Article focus:**

- The European Prospective Investigation of Cancer-Norfolk Eye Study is part of a European population-based cohort study, with participants now aged 48-92 years old.
- This paper describes the prevalence of small eyes, proportion with visual impairment, and associated demographic and biometric factors.

**Key messages:**

- Ninety-six participants out of 8033 (1.20%, 95% CI: 0.98 to 1.46) had an eye with axial length less than 21.00mm, of which 74 (77%) were female.
- People with small eyes appear more likely to be blind or have unilateral visual impairment. Presence of a small eye is associated with shorter height, lower body mass index, higher systolic blood pressure and lower intraocular pressure.
- There are no standardized definitions for microphthalmos or nanophthalmos

**Strengths and limitations of this study:**

- Large population based study sample.
- The included population sample may have healthy volunteer bias.
- The identified associations are cross-sectional rather than longitudinal.

## Introduction:

The small eye phenotype ranges from anophthalmos to nanophthalmos and microphthalmos. The latter two conditions are typically considered to be synonymous<sup>1</sup> and are subdivided into simplex<sup>2</sup> and complex<sup>3</sup> depending on the presence of other associated ocular or systemic abnormalities. There is minimal adult data on the prevalence of this phenotype with estimated birth prevalences for microphthalmos being 0.002 to 0.017%;<sup>4</sup> and 0.009% for microphthalmos in China from mass screening programs.<sup>5</sup> Data from a hospital cohort suggests patients with simple microphthalmos comprise between 0.05% and 0.11% ophthalmic patients.<sup>6</sup> There is great heterogeneity in the definition of nanophthalmos and microphthalmos which complicates interpretation of previous studies,<sup>2,7-12</sup> with a definition by axial length <21.00mm being the most inclusive.<sup>10-12</sup> Nanophthalmos / microphthalmos is associated with angle closure glaucoma,<sup>1,13</sup> and also with significant visual morbidity. In a recent series of nanophthalmic individuals from a Melanese population almost half had either unilateral or bilateral visual impairment.<sup>11</sup> There is a paucity of data for comparison. In view of this, we report data on the prevalence and characteristics of small eyes in British adults in the EPIC-Norfolk Eye Study, and review the definitions used for microphthalmos and nanophthalmos.

## Method:

EPIC (European Prospective Investigation of Cancer) is a pan-European study that started in 1989 with the primary aim of investigating the relationship between diet and cancer risk.<sup>14</sup> The aims of the EPIC-Norfolk cohort were subsequently broadened to include additional endpoints and exposures such as lifestyle and other environmental factors.<sup>15</sup> The EPIC-Norfolk cohort was recruited in 1993-1997 and comprised 25,639 predominantly white European participants aged 40-79 years. The third health examination was carried out between 2006 and 2011 with the objective of investigating various physical, cognitive and ocular characteristics of participants then aged 48-91 years.<sup>16</sup> The third health examination was reviewed and approved by the East Norfolk

1  
2  
3 and Waverney NHS Research Governance Committee (2005EC07L) and the  
4 Norfolk Research Ethics Committee (05/Q0101/191) and was performed in  
5 accordance with the principles of the Declaration of Helsinki. All participants  
6 gave written, informed consent.  
7  
8  
9

10  
11 All EPIC-Norfolk Eye Study participants underwent a detailed health  
12 examination performed by trained nurses following standard operating  
13 procedures. Ocular biometry was measured by non-contact partial coherence  
14 interferometry using the Zeiss IOLMaster Optical Biometer (IOLMaster, Carl  
15 Zeiss Meditech Ltd, Welwyn Garden City, UK). Five measurements of both  
16 axial length (AL) and anterior chamber depth (ACD, defined as corneal  
17 epithelium to anterior crystalline lens surface) and 3 measurements of central  
18 keratometry were made to allow calculation of mean values. Refractive error  
19 was measured using an autorefractor (Model 500, Humphrey Instruments,  
20 San Leandro, California, USA). Three intraocular pressure (IOP)  
21 measurements were made for each participant using the non-contact Ocular  
22 Response Analyzer (ORA, Reichert Inc, Depew, NY) and the mean Goldmann  
23 correlated IOP (IOPg) calculated. Visual acuity was measured under  
24 standardized conditions at 4m using participants' normal method of distance  
25 vision correction and recorded on the LogMAR scale. Fundal photographs  
26 were taken of both eyes using a TRC-NW65 non-mydratic retinal camera  
27 (Topcon Corporation, Tokyo, Japan) with Nikon D80 camera (Nikon  
28 Corporation, Tokyo, Japan). A masked, expert grader from the Moorfields  
29 Grading Centre measured vertical cup-disc ratio (VCDR). Systolic and  
30 diastolic blood pressures (BP) were taken from the right arm with the  
31 participant seated for 5 minutes. A stadiometer was used to record participant  
32 height to the nearest 0.1cm and weight was measured to the nearest 0.1 Kg  
33 using a body composition analyser (Tanita model TBF 300s, Chasmors Ltd,  
34 London, UK). Self reported data on education, occupation, alcohol intake and  
35 smoking status were recorded by questionnaire.  
36  
37  
38  
39  
40  
41  
42  
43  
44  
45  
46  
47  
48  
49  
50  
51  
52  
53

54 A small eye was defined by an axial length of <21.0mm in at least one eye in  
55 keeping with the broadest previously accepted definition for microphthalmos /  
56 nanophthalmos<sup>10-12</sup> and being equivalent to 2SD below the population mean  
57  
58  
59  
60

1  
2  
3 value.<sup>17</sup> All investigations were performed on both eyes of each participant  
4 and the data from the eye with lower axial length used for analyses at the  
5 participant level, with the exception of visual impairment classification where  
6 data from both were used. Visual impairment was defined by the presenting  
7 vision in accordance with the International Classification of Diseases Update  
8 and Revision 2006<sup>18</sup> and the World Health Organization (WHO), which  
9 formally comprises categories 1 to 5 with categories 3 to 5 being blindness.  
10 To allow comparison with previous publications we defined blindness as a  
11 presenting visual acuity  $\geq 1.3$  logMAR in the better eye and low vision as a  
12 presenting visual acuity of  $>0.48$  in the better eye (i.e. combination of  
13 moderate and severe visual impairment categories). Unilateral visual  
14 impairment was defined by using the eye with worse presenting visual acuity.  
15  
16  
17  
18  
19  
20  
21  
22  
23

24 Statistical analysis was performed using SPSS version 20. Testing of  
25 normality was performed by the Kolmogorow-Smirnov method. Comparisons  
26 between participants with and without previous lens extraction were  
27 performed using the independent samples t-test or Mann-Whitney U test.  
28 Logistic regression was used to identify factors associated with presence of a  
29 small eye and Fisher's exact test to compare presence of visual impairment  
30 with the presence of a small eye.  
31  
32  
33  
34  
35  
36  
37

### 38 **Results.**

39 Partial coherence interferometry data was available on 15,881 eyes of 8,033  
40 participants, of which 4,442 participants were female (55.3%). Case numbers  
41 and overall prevalence values for small eyes stratified by axial length value  
42 are shown in table 1 and figure 1. Of the 8033 participants with axial length  
43 data, visual acuity measurements were available on 8016 (99.8%).  
44  
45  
46  
47  
48  
49  
50  
51  
52  
53  
54  
55  
56  
57  
58  
59  
60



Table 1: Number of participants/ eyes and overall prevalence values (with 95% confidence intervals) by axial length (mm).

| Axial length (mm) | a) Analysis by participant |                         | b) Analysis by eyes |                         |
|-------------------|----------------------------|-------------------------|---------------------|-------------------------|
|                   | Number                     | Prevalence (95% CI)     | Number              | Prevalence (95% CI)     |
| <21.00            | 96                         | 1.195% (0.980 to 1.457) | 132                 | 0.831% (0.702 to 0.985) |
| <20.50            | 47                         | 0.585% (0.441 to 0.777) | 57                  | 0.359% (0.277 to 0.465) |
| <20.00            | 22                         | 0.274% (0.182 to 0.414) | 24                  | 0.151% (0.102 to 0.225) |
| <19.00            | 14                         | 0.174% (0.105 to 0.292) | 14                  | 0.088% (0.053 to 0.148) |
| <18.00            | 11                         | 0.137% (0.077 to 0.245) | 11                  | 0.069% (0.039 to 0.124) |
| <17.00            | 4                          | 0.050% (0.020 to 0.127) | 4                   | 0.025% (0.010 to 0.065) |
| <16.00            | 1                          | 0.012% (0.003 to 0.069) | 1                   | 0.006% (0.002 to 0.035) |
| <15.00            | 1                          | 0.012% (0.003 to 0.069) | 1                   | 0.006% (0.002 to 0.035) |

Of the 96 participants, 20 were pseudophakic in both eyes, 6 were pseudophakic in one eye, 1 was aphakic in both eyes (congenital cataracts and nystagmus) and 1 aphakic in one eye and pseudophakic in the other. Defined by smallest eye, 26 participants had undergone previous lens extraction. Fourteen participants (15%) had a history of amblyopia or previous squint surgery. Seven participants (7%) had a history of previous laser iridotomy or surgical iridectomy. Table 2 shows the demographic and biometric characteristics of those with axial length <21.00mm.

Table 2: Demographic and biometric data presented as mean values with (standard deviation and range min: max value (range for all participants only), with [median values, IQR] shown for AL & ACD only. Comparisons with p values are between phakic and those with previous lens extraction.

|                                   | All, axial length <21.00mm                    | Phakic                        | Previous lens extraction      | p value |
|-----------------------------------|-----------------------------------------------|-------------------------------|-------------------------------|---------|
| Number                            | 96                                            | 70                            | 26                            | -       |
| Age [years]                       | 69.0 (8.8, 50.9 to 89.2)                      | 66.3 (7.5)                    | 76.5 (7.6)                    | <0.001  |
| Sex                               | 22M, 74F                                      | 13M/ 57F                      | 9M/ 17F                       | 0.11    |
| AL [mm]                           | 20.05 (1.26, 14.27 to 20.98)<br>[20.53, 0.80] | 20.45 (0.85)<br>[20.61, 0.48] | 18.96 (1.55)<br>[18.91, 2.85] | <0.001  |
| ACD [mm]                          | 2.94 (0.69)<br>[2.75, 0.78]                   | 2.67 (0.44)<br>[2.62, 0.44]   | 3.75 (0.71)<br>[3.98, 0.92]   | <0.001  |
| Mean K [D]                        | 45.24 (1.62, 41.71 to 51.19)                  | 45.45 (1.65)                  | 44.64 (1.41)                  | 0.044   |
| SE [D]                            | +3.63 (2.94, -5.50 to +8.38)                  | +5.04 (1.84)                  | -0.15 (1.71)                  | <0.001  |
| Anisometropia, [D]                | 1.13 (1.23, 0.00 to 6.76)                     | 1.20 (1.27)                   | 0.94 (1.09)                   | 0.37    |
| V/A [logMAR]                      | 0.31 (0.47, -0.20 to 1.68)                    | 0.37 (0.53)                   | 0.16 (0.24)                   | 0.061   |
| LogMAR difference<br>between eyes | 0.31 (0.44, 0.00 to 1.82)                     | 0.38 (0.49)                   | 0.12 (0.19)                   | 0.012   |
| IOP [mmHg]                        | 15.7 (3.8)                                    | 15.6 (3.9)                    | 16.0 (3.3)                    | 0.63    |

Analysis of the difference in axial length between eyes showed a bimodal distribution (figure 2) with 19 participants (20%) comprising the second peak with a mean axial length difference of 5.63mm (SD 0.97) compared to 77 participants in the first peak with mean axial length difference of 0.45mm (SD 0.39).

Both univariable and multiple variable regression analyses investigating ocular biometric parameters in phakic eyes showed small eyes were associated with shallower anterior chamber depth, steeper corneal keratometry and higher spherical equivalent (all  $p < 0.001$ , Table 3). Separate analyses were performed for other, non-ocular biometric parameters. For these, univariable logistic regression analyses showed female sex (OR 2.75,  $p < 0.001$ ), height (per 10cm, OR 0.46,  $p < 0.001$ ), weight (per 10Kg, OR 0.60,

1  
2  
3 p<0.001, body mass index (BMI, OR: 0.68, p=0.005) and systolic blood  
4 pressure (per 10mmHg, OR 1.11, P=0.029) were associated with the  
5 presence of a small eye. Multiple variable logistic regression models showed  
6 shorter height, lower BMI, higher systolic BP and lower IOP to be independent  
7 predictors of a small eye (Table 3).  
8  
9  
10

11  
12  
13  
14 Table 3: Univariable and multiple variable logistic regression analyses of factors  
15 associated with small eyes. Ref: reference category. For the multiple variable  
16 regression models (either a or b), only parameters reaching statistical significance in  
17 the respective univariable analysis were included, and only those in the final model  
18 shown.  
19  
20  
21  
22  
23  
24  
25  
26  
27  
28  
29  
30  
31  
32  
33  
34  
35  
36  
37  
38  
39  
40  
41  
42  
43  
44  
45  
46  
47  
48  
49  
50  
51  
52  
53  
54  
55  
56  
57  
58  
59  
60

| a) Ocular biometric parameters: phakic participants |            |              |         |
|-----------------------------------------------------|------------|--------------|---------|
| Univariable regression                              | Odds ratio | 95% CI       | p value |
| Anterior chamber depth (per 1mm)                    | 0.06       | 0.03 to 0.12 | <0.001  |
| Mean keratometry (per 1D)                           | 2.16       | 1.82 to 2.57 | <0.001  |
| Spherical equivalent (per 1D)                       | 2.67       | 2.35 to 3.03 | <0.001  |
| Multiple variable regression                        | Odds ratio | 95% CI       | p value |
| Anterior chamber depth (per 1mm)                    | 0.02       | 0.01 to 0.08 | <0.001  |
| Mean keratometry (per 1D)                           | 5.97       | 3.98 to 8.98 | <0.001  |
| Spherical equivalent (per 1D)                       | 5.89       | 4.16 to 8.31 | <0.001  |
| b) Other parameters: all participants               |            |              |         |
| Univariable regression                              | Odds ratio | 95% CI       | p value |
| Age (per decade)                                    | 1.06       | 0.82 to 1.36 | 0.67    |
| Female sex                                          | 2.75       | 1.70 to 4.43 | <0.001  |
| Height (per 10cm)                                   | 0.46       | 0.36 to 0.58 | <0.001  |
| Weight (per 10Kg)                                   | 0.60       | 0.51 to 0.72 | <0.001  |
| BMI (per 5 kg/m <sup>2</sup> )                      | 0.68       | 0.52 to 0.89 | 0.005   |
| Social class                                        |            |              |         |
| Professional                                        | Ref        |              |         |
| Managerial/technical                                | 0.81       | 0.39 to 1.69 | 0.57    |
| Skilled non-manual                                  | 0.91       | 0.40 to 2.09 | 0.82    |
| Skilled manual                                      | 0.95       | 0.43 to 2.10 | 0.90    |
| Partly-skilled                                      | 1.06       | 0.44 to 2.53 | 0.90    |
| Unskilled                                           | 1.76       | 0.53 to 5.77 | 0.35    |
| Education level                                     |            |              |         |
| Less than O level                                   | Ref        |              |         |
| O Level                                             | 1.31       | 0.69 to 2.50 | 0.41    |
| A level                                             | 0.94       | 0.57 to 1.55 | 0.81    |
| Degree                                              | 0.93       | 0.50 to 1.76 | 0.83    |
| Systolic blood pressure (per 10mmHg)                | 1.11       | 1.01 to 1.23 | 0.029   |
| Diasolic blood pressure (per 10mmHg)                | 0.97       | 0.78 to 1.20 | 0.78    |
| Self-reported alcohol intake                        |            |              |         |
| No intake                                           | Ref        |              |         |
| <7 units/wk                                         | 0.81       | 0.48 to 1.37 | 0.43    |
| ≥7 <14 units/wk                                     | 0.61       | 0.33 to 1.13 | 0.12    |
| ≥14 <21 units/wk                                    | 0.61       | 0.28 to 1.33 | 0.22    |
| ≥21 units/wk                                        | 0.70       | 0.38 to 1.28 | 0.25    |
| Smoking status                                      |            |              |         |
| Never                                               | Ref        |              |         |
| Ever                                                | 0.85       | 0.56 to 1.27 | 0.41    |
| Intraocular pressure (mmHg)                         | 0.95       | 0.90 to 1.01 | 0.09    |
| Multiple variable regression                        | Odds ratio | 95% CI       | p value |
| Age (per decade)                                    | 0.89       | 0.68 to 1.17 | 0.40    |
| Female sex                                          | 0.91       | 0.47 to 1.77 | 0.77    |
| Height (per 10cm)                                   | 0.42       | 0.29 to 0.59 | <0.001  |
| BMI (per 5 kg/m <sup>2</sup> )                      | 0.69       | 0.53 to 0.90 | 0.006   |
| Systolic blood pressure (per 10mmHg)                | 1.11       | 1.01 to 1.22 | 0.030   |
| Intraocular pressure (mmHg)                         | 0.93       | 0.88 to 0.99 | 0.030   |

1  
2  
3  
4  
5  
6  
7  
8  
9  
10  
11  
12  
13  
14  
15  
16  
17  
18  
19  
20  
21  
22  
23  
24  
25  
26  
27  
28  
29  
30  
31  
32  
33  
34  
35  
36  
37  
38  
39  
40  
41  
42  
43  
44  
45  
46  
47  
48  
49  
50  
51  
52  
53  
54  
55  
56  
57  
58  
59  
60

Optic disc grading was possible on both eyes of 61/ 96 (64%) participants and at least one eye of 82/96 (85%) participants (right eyes: 12 missing, 9 ungradable; left eyes: 14 missing, 14 ungradable). Three participants (3/61, 4.9%) had vertical cup:disc ratio (VCDR) asymmetry of 0.2 or more, and 1 additional participant had an optic disc consistent with glaucoma (localized absence of neural rim, one eye only), giving an overall prevalence of 4/61 (6.6%, 95% CI: 2.6 to 15.7%) for glaucomatous optic neuropathy. No eye had a VCDR of  $\geq 0.6$ . Five of 96 (5.2%) participants gave a diagnosis of "glaucoma" in their past medical history, of these only 1 had a diagnosis consistent with their optic disc photographs. Three participants had one optic disc with disc drusen. There were no cases of macular hypoplasia, macular schisis, coloboma or any other retinal abnormality associated with nanophthalmos.

Visual acuity data were available for all 96 participants and values are shown in table 2. One participant (1.0%) was classified as blind by the WHO definition (visual acuity of less than 1.3 logMAR) and 2/96 (2.1%) had any degree of visual impairment. Using a definition of visual impairment of  $>0.30$  logMAR in the better eye to allow comparison with previous visual impairment studies, the prevalence was 5/96 (5.2%). The prevalence of blindness was significantly higher in EPIC-Norfolk participants with at least one eye of axial length  $<21.00$ mm compared to those without, whilst the overall prevalence of low vision was similar (Table 4). Unilateral visual impairment by all definitions was more common in EPIC-Norfolk participants with at least one small eye compared to those without ( $P \leq 0.001$ , Table 4).

Table 4: Percentages of bilateral and unilateral visual impairment in participants with one or both eyes with axial length <21.00mm (n=96) compared to all EPIC-Norfolk participants with no eye of axial length <21.00mm (n=7920) by Fishers exact test. Bilateral visual impairment is defined as both eyes with a visual acuity less than the respective value and unilateral visual impairment as one eye with a visual acuity less than the respective value.

| logMAR           | Snellen equivalent | Classification                                                | Overall EPIC-Norfolk cohort (n=7920 total) |                     | EPIC-Norfolk participants with small eyes (n=96 total) |                     | p value |
|------------------|--------------------|---------------------------------------------------------------|--------------------------------------------|---------------------|--------------------------------------------------------|---------------------|---------|
|                  |                    |                                                               | n                                          | Prevalence (95% CI) | n                                                      | Prevalence (95% CI) |         |
| >1.30 better eye | <3/60;<br>20/400   | WHO blindness                                                 | 2                                          | 0.03% (0.00, 0.06)  | 1                                                      | 1.0% (0.0, 3.1)     | 0.036   |
| >0.48 better eye | <6/18;<br>20/60    | Blindness and visual impairment; "low vision."                | 45                                         | 0.6% (0.4, 0.7)     | 2                                                      | 2.1% (0.0, 5.0)     | 0.11    |
| >0.22 better eye | <6/10;<br>20/32    | UK driving standard                                           | 422                                        | 5.3% (4.8, 5.8)     | 7                                                      | 7.29% (2.0, 12.56)  | 0.36    |
| >0.30 better eye | <6/12;<br>20/40    | Previous visual impairment studies, American driving standard | 259                                        | 3.3% (2.9, 3.7)     | 5                                                      | 5.2% (0.7, 9.7)     | 0.25    |
| >1.0 worse eye   | <6/60;<br>20/200   | Unilateral visual impairment                                  | 120                                        | 1.5% (1.3, 1.8)     | 11                                                     | 11.5% (5.0, 18.0)   | <0.001  |
| >0.48 worse eye  | <6/18;<br>20/60    | Unilateral visual impairment                                  | 470                                        | 5.9% (5.4, 6.5)     | 24                                                     | 25.0% (16.2, 33.8)  | <0.001  |
| >0.30 worse eye  | <6/12;<br>20.40    | Unilateral visual impairment                                  | 1,341                                      | 16.9% (16.1, 17.8)  | 29                                                     | 30.2% (20.9, 39.6)  | 0.001   |

### Discussion:

There is minimal data describing the prevalence or characteristics of small eyes. In the EPIC-Norfolk Eye Study, the prevalence of a participant with an eye of axial length of <21.00mm was 1.20%, and 0.27% for those with an eye of axial length <20.00mm. Relative to existing data with estimated birth prevalences for microphthalmos being 0.002% to 0.017%;<sup>4,5</sup> and the prevalence of simple microphthalmos in hospital ophthalmic patients being between 0.05% and 0.11%;<sup>6</sup> small eyes are more common than previously reported.

Nanophthalmos is traditionally associated with a high prevalence of angle closure glaucoma<sup>1,13</sup> and both nanophthalmos and primary angle closure glaucoma have similar ocular phenotypes including a short axial length,

1  
2  
3 shallow anterior chamber, hyperopia, small radius of corneal curvature and a  
4 thick crystalline lens. In this study, the prevalence of glaucomatous optic  
5 neuropathy was estimated to be 6.6% in small eyes based on CDR, CDR  
6 asymmetry or rim abnormalities consistent with glaucoma. Othman and co-  
7 workers reported that 12/22 (55%) nanophthalmic individuals had occludable  
8 anterior chamber angles or glaucoma.<sup>19</sup> In the case series by Tay and co-  
9 workers of 17 individuals with nanophthalmos, no data on glaucoma  
10 prevalence is reported.<sup>11</sup> For comparison, the prevalence of glaucoma (open  
11 angle and closed angle combined) has been estimated to be 2.4% in  
12 European populations.<sup>20</sup> We did not calculate VCDR percentiles for the  
13 overall EPIC cohort as per the ISGEO (International Society Geographical &  
14 Epidemiological Ophthalmology) definition of glaucoma,<sup>21</sup> however no small  
15 eye in our series had a VCDR of  $\geq 0.60$ . Crowston et al. reported optic disc  
16 size adjusted VCDR percentiles from the Blue Mountains Eye Study<sup>22</sup> and  
17 showed that for small discs (1.2mm vertical diameter) in non-glaucomatous  
18 eyes, the 97.5th percentile for VCDR was 0.60 (99th percentile: 0.62) whilst  
19 corresponding values for large optic discs (1.9mm diameter) were 0.75 and  
20 0.83 respectively. Thus our prevalence of 6.6% should be considered as a  
21 minimum prevalence estimate for glaucoma in small eyes, and is likely to  
22 include those at highest risk for visual impairment over their lifetime.<sup>21</sup>  
23  
24  
25  
26  
27  
28  
29  
30  
31  
32  
33  
34  
35  
36  
37

38 Review of recent studies reporting on nanophthalmos / microphthalmos  
39 shows great heterogeneity in the definitions used, with cases defined primarily  
40 by short axial length with for example, values of  $<21.0\text{mm}$ ,<sup>10-12</sup>  $<20.9\text{mm}$ ,<sup>2</sup>  
41  $<20.5\text{mm}$ ,<sup>7</sup>  $<20.0\text{mm}$ ,<sup>8</sup>  $<18\text{mm}^2$  or  $<17\text{mm}$ .<sup>9</sup> The original description of  
42 nanophthalmos (or pure microphthalmos) by Duke-Elder<sup>1</sup> is an eye “reduced  
43 in volume without the presence of other gross congenital abnormalities,”  
44 “typical dimensions are 16-18.5mm sagittal,” “hyperopia is the rule” and “the  
45 anterior chamber is typically shallow.” The partial relaxation of the definition to  
46 its currently accepted form (of at least an axial length of  $<21.00\text{mm}$ ) is likely  
47 due to the rarity of the condition. If an abnormally short eye is defined based  
48 on the lower 2SD and 3SD limits of mean population axial lengths, then the  
49 calculated limits are approximately 21.0mm and 20.0mm respectively.<sup>16</sup> In a  
50 previous study by our group investigating complications in small eyes  
51  
52  
53  
54  
55  
56  
57  
58  
59  
60

1  
2  
3 (<21.00mm) undergoing phacoemulsification and lens implantation, only axial  
4 length and the presence of abnormal IOP remained significant predictors of  
5 any complication in multiple variable regression analysis.<sup>12</sup> Complications  
6 were 15 times more likely in cases with axial length of <20.0mm (compared to  
7 those 20.00-21.00mm,  $p \leq 0.001$ ). The differential complication rate supports  
8 the previous recommendation by Weiss et al.<sup>2</sup> that microphthalmos and  
9 nanophthalmos should be considered as 2 separate phenotypes, based on  
10 axial length. Based on the above it would appear reasonable to classify small  
11 eyes into microphthalmos (<21.0mm) and nanophthalmos (<20.0mm)  
12 respectively.  
13  
14  
15  
16  
17  
18  
19

20  
21 We found 1% of participants with small eyes were blind and 2% had low  
22 vision. When compared to all EPIC-Norfolk participants, blindness appears to  
23 be more common in those with a small eye ( $p=0.036$ , although case numbers  
24 were very low), but low vision was not ( $p=0.36$ ). Unilateral visual impairment  
25 (defined by the worse seeing eye) was more common by all definitions ( $p \leq$   
26 0.001). When compared to data from population studies, the prevalence of  
27 visual impairment in EPIC-Norfolk participants is low overall, and values in  
28 those with small eyes is again low or similar. In the Blue Mountains Eye  
29 Study,<sup>23</sup> 4.6% had a visual acuity of 6/12 (20/40) or less in the better eye, and  
30 14.4% had a visual acuity of 6/12 or less in their worse eye, whereas in our  
31 cohort of small eyes the equivalent percentages were 5.2% and 30.2%. In the  
32 Salisbury Eye Study, 9% of participants aged 75 to 84 years old had a visual  
33 acuity of <6/12 in their better eye;<sup>24</sup> whilst in the MRC study in Britain this  
34 value was 15% for those 75 to 84 years old.<sup>25</sup> There is minimal data on visual  
35 impairment in nanophthalmic individuals, with a recent study in a Melanesia  
36 population<sup>11</sup> (definition: axial length usually <21mm in at least one eye)  
37 reporting 5/17 (29%) had bilateral visual impairment and 9/17 (53%) had  
38 unilateral visual impairment (defined as <6/12 (20/40) Snellen in the better  
39 eye).  
40  
41  
42  
43  
44  
45  
46  
47  
48  
49  
50  
51  
52

53  
54 We found a marked bimodal distribution in axial length difference between  
55 eyes in individuals with small eyes, with 20% individuals having >3.5mm axial  
56 length asymmetry. A bimodal distribution in axial length difference has not  
57  
58  
59  
60



1  
2  
3 previously been described, with Weiss et al.<sup>2</sup> reporting a difference of only  
4 0.4mm or less in a series of 21 patients with simple microphthalmos.  
5  
6  
7

8 Our study has a number of limitations; these being primarily the absence of  
9 lens thickness and scleral thickness data to further characterize participants  
10 with small eyes. Additionally participants were not examined on a slit-lamp for  
11 eg. gonioscopy to determine the presence of an occludable anterior chamber  
12 angle (and therefore to determine if the glaucomatous optic neuropathy in our  
13 5 cases were in the presence of an open or closed anterior chamber angle).  
14 Our prevalence value for glaucoma was based on glaucomatous optic  
15 neuropathy rather than glaucomatous optic neuropathy and visual field  
16 defect.<sup>21</sup> Comparisons of visual acuities were only performed in EPIC-Norfolk  
17 participants in whom axial lengths were measurable, and consequently this  
18 may have excluded those with visual impairment or blindness where axial  
19 length could not have been measured optically (ie. underestimating  
20 prevalence values). Additionally, those with visual impairment may have self-  
21 selected not to participate in the EPIC-Norfolk Eye Study, thus again  
22 underestimating case numbers.  
23  
24  
25  
26  
27  
28  
29  
30  
31  
32  
33

34 In summary, the small eye phenotype was more common than previously  
35 reported, and our study provides prevalence values in British adults. There  
36 are no standardized definitions for microphthalmos or nanophthalmos;  
37 however based on current evidence, subdivision by axial length of <21.0mm  
38 for microphthalmos and <20.0mm for nanophthalmos appears reasonable.  
39 People with small eyes appear more likely to be blind or have unilateral visual  
40 impairment. The estimated prevalence of glaucomatous optic neuropathy in  
41 our cohort appeared to be lower than expected and warrants further  
42 investigation.  
43  
44  
45  
46  
47  
48  
49  
50  
51  
52  
53  
54  
55  
56  
57  
58  
59  
60

**Figure legends:**

Figure 1: Graph showing the prevalence of an axial length less than the value shown at the participant level (defined by eye with shortest axial length), and at the eye level.

Figure 2: Cumulative frequency distribution of axial length difference (asymmetry) between eyes for each participant. Note the bimodal distribution.

**FINANCIAL SUPPORT:**

Supported by Grant G0401527 from the Medical Research Council, UK and Grant 262 from Research into Ageing, UK. APK is funded by a Wellcome Trust Clinical Research Fellowship. PJF was also supported by the Richard Desmond Charitable Trust (via Fight for Sight, grant 1956). ACD, TP & PJF were supported by the National Institute for Health Research (NIHR) Biomedical Research Centre based at Moorfields Eye Hospital NHS Foundation Trust and UCL Institute of Ophthalmology. The views expressed are those of the author(s) and not necessarily those of the NHS, the NIHR or the Department of Health

**COMPETING/ CONFLICTS OF INTEREST:**

No conflicting relationship exists for any author.

**COPYRIGHT STATEMENT:**

The Corresponding Author has the right to grant on behalf of all authors and does grant on behalf of all authors, an exclusive licence (or non-exclusive for government employees) on a worldwide basis to the BMJ Group and co-owners or contracting owning societies (where published by the BMJ Group on their behalf), and its Licensees to permit this article (if accepted) to be published in BMJ Open and any other BMJ Group products and to exploit all subsidiary rights, as set out in our licence.

## CONTRIBUTORSHIP

ACD performed the data analysis and drafted the manuscript. APK contributed to the data analysis. TP contributed to the data analysis. SH contributed to the conception and design of the study. RL contributed to the design of the study, and to data acquisition and management. DCB contributed to the conception and design of the study. KTK and PJF contributed to the conception and design of the study, and to data interpretation. All authors read and critically revised the manuscript. All authors approved the final manuscript.

## DATA SHARING

The data sharing and preservation strategy in EPIC-Norfolk is in accordance with the Wellcome Trust data management and sharing policy. Full details about the study including contact information are on the website <http://www.epic-norfolk.org.uk>. Investigators wishing to work with EPIC data contact the EPIC management group through the website, letter, phone or fax, and proposals have to fulfil a number of criteria including that the work is within the bounds of consent given by participants and has been ethically reviewed and approved; there is no serious risk to the viability of continuing the cohort study for example, through offence to the participants from use of the data supplied; the science of the proposal has been satisfactorily peer reviewed and the proposal does not duplicate work already being done. Access to data for collaborators is provided through password protected website access. The large numbers of collaborators EPIC-Norfolk has locally, nationally and internationally (>300), as evidenced by collaborative publications, demonstrate the commitment to maximising the value of the study.

**References:**

- 1 Duke-Elder S. *System of Ophthalmology: Volume 3*. Henry Kimpton, London 1964.
- 2 Weiss AH, Kousseff BG, Ross EA, *et al*. Simple microphthalmos. *Arch Ophthalmol* 1989;**107**:1625–30.
- 3 Weiss AH, Kousseff BG, Ross EA, *et al*. Complex microphthalmos. *Arch Ophthalmol* 1989;**107**:1619–24.
- 4 Shah SP, Taylor AE, Sowden JC, *et al*. Anophthalmos, microphthalmos, and typical coloboma in the United Kingdom: a prospective study of incidence and risk. *Invest Ophthalmol Vis Sci* 2011;**52**:558–64.
- 5 Hu Z, Yu C, Li J, *et al*. A novel locus for congenital simple microphthalmia family mapping to 17p12-q12. *Invest Ophthalmol Vis Sci* 2011;**52**:3425–9.
- 6 Singh OS, Simmons RJ, Brockhurst RJ, *et al*. Nanophthalmos: a perspective on identification and therapy. *Ophthalmology* 1982;**89**:1006–12.
- 7 Steijns D, Bijlsma WR, Van der Lelij A. Cataract Surgery in Patients with Nanophthalmos. *Ophthalmology* 2013;**120**:266–70.
- 8 Yuzbasioglu E, Artunay O, Agachan A, *et al*. Phacoemulsification in patients with nanophthalmos. *Can J Ophthalmol* 2009;**44**:534–9.
- 9 Faucher A, Hasanee K, Rootman DS. Phacoemulsification and intraocular lens implantation in nanophthalmic eyes: report of a medium-size series. *J Cataract Refract Surg* 2002;**28**:837–42.
- 10 Wu W, Dawson DG, Sugar A, *et al*. Cataract surgery in patients with nanophthalmos: results and complications. *J Cataract Refract Surg* 2004;**30**:584–90.
- 11 Tay T, Smith JE, Berman Y, *et al*. Nanophthalmos in a Melanesian population. *Clin Experiment Ophthalmol* 2007;**35**:348–54.
- 12 Day AC, Maclaren RE, Bunce C, *et al*. Outcomes of phacoemulsification and intraocular lens implantation in microphthalmos and nanophthalmos. *J Cataract Refract Surg* 2013;**39**:87–96.
- 13 Kimbrough RL, Trempe CS, Brockhurst RJ, *et al*. Angle-closure glaucoma in nanophthalmos. *Am J Ophthalmol* 1979;**88**:572–9.
- 14 Riboli E. Nutrition and cancer: background and rationale of the European Prospective Investigation into Cancer and Nutrition (EPIC). *Ann Oncol* 1992;**3**:783–91.

- 15 Day N, Oakes S, Luben R, *et al.* EPIC-Norfolk: study design and characteristics of the cohort. *European Prospective Investigation of Cancer. Br J Cancer* 1999;**80 Suppl 1**:95–103.
- 16 Khawaja AP, Chan MPY, Hayat S, *et al.* The EPIC-Norfolk Eye Study: rationale, methods and a cross-sectional analysis of visual impairment in a population-based cohort. *BMJ Open* 2013;**3**. doi:10.1136/bmjopen-2013-002684
- 17 Foster PJ, Broadway DC, Hayat S, *et al.* Refractive error, axial length and anterior chamber depth of the eye in British adults: the EPIC-Norfolk Eye Study. *Br J Ophthalmol* 2010;**94**:827–30.
- 18 Pascolini D, Mariotti SP. Global estimates of visual impairment: 2010. *Br J Ophthalmol* 2012;**96**:614–8.
- 19 Othman MI, Sullivan SA, Skuta GL, *et al.* Autosomal dominant nanophthalmos (NNO1) with high hyperopia and angle-closure glaucoma maps to chromosome 11. *The American Journal of Human Genetics* 1998;**63**:1411–8.
- 20 Quigley HA, Broman AT. The number of people with glaucoma worldwide in 2010 and 2020. *Br J Ophthalmol* 2006;**90**:262–7.
- 21 Foster PJ, Buhrmann R, Quigley HA, *et al.* The definition and classification of glaucoma in prevalence surveys. *Br J Ophthalmol* 2002;**86**:238–42.
- 22 Crowston JG, Hopley CR, Healey PR, *et al.* The effect of optic disc diameter on vertical cup to disc ratio percentiles in a population based cohort: the Blue Mountains Eye Study. *Br J Ophthalmol* 2004;**88**:766–70.
- 23 Wang JJ, Foran S, Mitchell P. Age-specific prevalence and causes of bilateral and unilateral visual impairment in older Australians: the Blue Mountains Eye Study. *Clinical & Experimental Ophthalmology* 2000;**28**:268–73.
- 24 West SK, Munoz B, Rubin GS, *et al.* Function and visual impairment in a population-based study of older adults. The SEE project. Salisbury Eye Evaluation. *Investigative Ophthalmology & Visual Science* 1997;**38**:72–82.
- 25 Evans JR, Fletcher AE, Wormald RPL, *et al.* Prevalence of visual impairment in people aged 75 years and older in Britain: results from the MRC trial of assessment and management of older people in the community. *Br J Ophthalmol* 2002;**86**:795–800.

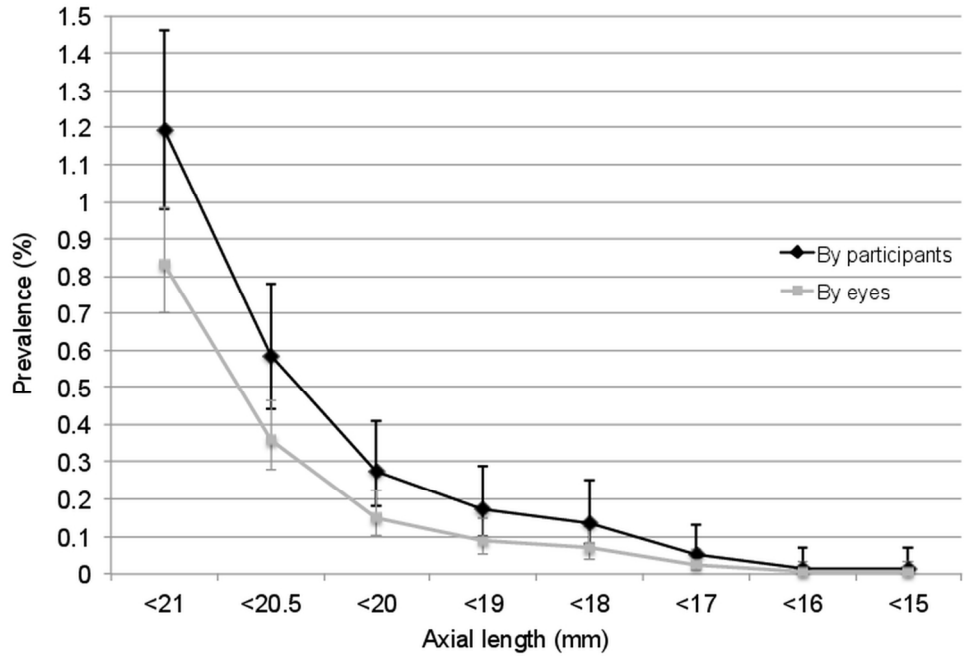

Figure 1: Graph showing the prevalence of an axial length less than the value shown at the participant level (defined by eye with shortest axial length), and at the eye level.  
130x90mm (300 x 300 DPI)

View only

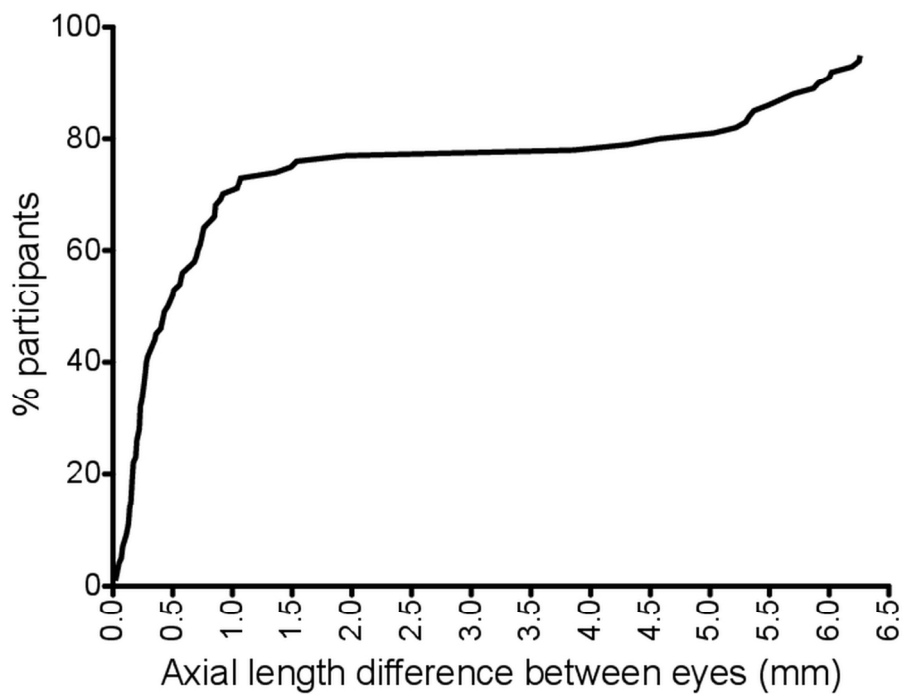

Figure 2: Cumulative frequency distribution of axial length difference (asymmetry) between eyes for each participant. Note the bimodal distribution.  
120x90mm (300 x 300 DPI)

Review only
